# Supplementary material for: Dissemination of Quinolone-Resistant Escherichia coli in the Norwegian Broiler and Pig Production Chains and Possible Persistence in the Broiler Production Environment
Source: PubMed Central journal article supplement (PMC7082582; doi:10.1128/aem.02769-19), 2020-03-18
Supplement: AEM.02769-19-s0001.pdf [file AEM.02769-19-s0001.pdf]

# Supplementary material

## Contents

|                                                                                                           |           |
|-----------------------------------------------------------------------------------------------------------|-----------|
| <b>Section 1: Supplementary tables</b>                                                                    | <b>2</b>  |
| Table S1: Group listing . . . . .                                                                         | 2         |
| Table S2: Occurrence of antimicrobial resistance among the selected quinolone resistant isolates. . . . . | 4         |
| Table S3: Prokka reference genomes . . . . .                                                              | 5         |
| Table S4: Identified amino acid substitutions in the QRDR of GyrA, ParC and ParE. . . . .                 | 6         |
| Table S5: QRDR substitutions in GyrA, ParC and ParE per animal species. . . . .                           | 7         |
| Table S6: AA substitutions in MarA, MarR, RobA, RpoB and SoxR. . . . .                                    | 9         |
| Table S7: Mechanisms in isolates without substitutions in QRDR . . . . .                                  | 10        |
| Table S8: Other plasmid mediated genes . . . . .                                                          | 11        |
| Table S9: Co-resistance . . . . .                                                                         | 12        |
| Table S10: SNP distance statistics on isolates from the same species. . . . .                             | 13        |
| <b>Section 2: Supplementary figures</b>                                                                   | <b>14</b> |
| Figure S1: Clade selection based on patristic distances . . . . .                                         | 14        |
| Figure S2: Stressplot . . . . .                                                                           | 15        |
| Figure S3: Correlations between chromosomal genes and plasmid mediated genes . . . . .                    | 16        |
| Figure S4: Iteration analysis results . . . . .                                                           | 17        |
| Figure S5: Maximum likelihood tree, Clade A . . . . .                                                     | 18        |
| Figure S6: Maximum likelihood tree, Clade C . . . . .                                                     | 19        |
| Figure S7: Maximum likelihood tree, Clade D . . . . .                                                     | 20        |
| Figure S8: Maximum likelihood tree, Clade E . . . . .                                                     | 21        |
| <b>Section 3: Metadata and reference sequences</b>                                                        | <b>22</b> |
| 3.1: Isolate information and metadata . . . . .                                                           | 22        |
| 3.2: FastQC analysis results . . . . .                                                                    | 22        |
| 3.3: Mash screen results . . . . .                                                                        | 22        |
| 3.4: QRDR determination of GyrB, ParC and ParE . . . . .                                                  | 22        |
| 3.5: ARIBA flag selection . . . . .                                                                       | 22        |
| 3.6: MEGARes and ResFinder reference sequences . . . . .                                                  | 22        |
| 3.7: QUASt results . . . . .                                                                              | 23        |
| <b>References</b>                                                                                         | <b>24</b> |

## Section 1: Supplementary tables

**Table S1: Group listing**

The table presents the different phenotypic groups used in the isolate selection, and the number of isolates from each animal species in each group. The number of resistances within each group is listed in the column “No. of resistances”.

| Group | No. of resistances | CIP  | NAL | Isolates per species                              | Total isolates |
|-------|--------------------|------|-----|---------------------------------------------------|----------------|
| 1     | 1                  | 0.06 | 32  | Pig (3), Wild bird (1), Red fox (2)               | 6              |
| 2     | 1                  | 0.06 | 64  | Red fox (1)                                       | 1              |
| 3     | 1                  | 0.25 | 4   | Pig (1), Broiler (1)                              | 2              |
| 4     | 1                  | 0.25 | 8   | Pig (3), Wild bird (1)                            | 4              |
| 5     | 1                  | 0.25 | 16  | Pig (4)                                           | 4              |
| 6     | 1                  | 0.5  | 4   | Pig (1)                                           | 1              |
| 7     | 1                  | 0.5  | 8   | Wild bird (2)                                     | 2              |
| 8     | 1                  | 0.5  | 16  | Pig (2), Wild bird (3)                            | 5              |
| 9     | 2                  | 0.06 | 32  | Pig (1)                                           | 1              |
| 10    | 2                  | 0.12 | 32  | Broiler (4), Wild bird (1)                        | 5              |
| 11    | 2                  | 0.12 | 64  | Broiler (1), Wild bird (1), Red fox (1)           | 3              |
| 12    | 2                  | 0.12 | 128 | Broiler (5), Wild bird (1)                        | 6              |
| 13    | 2                  | 0.25 | 8   | Pig (1), Wild bird (1), Red fox (2)               | 4              |
| 14    | 2                  | 0.25 | 32  | Broiler (1)                                       | 1              |
| 15    | 2                  | 0.25 | 64  | Pig (2), Broiler (5)                              | 7              |
| 16    | 2                  | 0.25 | 128 | Broiler (11), Pig (2), Wild bird (1), Red fox (3) | 17             |
| 17    | 2                  | 0.25 | 256 | Broiler (1), Pig (4), Wild bird (4), Red fox (3)  | 12             |
| 18    | 2                  | 0.5  | 8   | Pig (1)                                           | 1              |
| 19    | 2                  | 0.5  | 16  | Wild bird (1)                                     | 1              |
| 20    | 2                  | 0.5  | 32  | Pig (1)                                           | 1              |
| 21    | 2                  | 0.5  | 128 | Broiler (2)                                       | 2              |
| 22    | 2                  | 0.5  | 256 | Broiler (3)                                       | 3              |
| 23    | 2                  | 1    | 256 | Broiler (1), Wild bird (1), Red fox (2)           | 4              |
| 24    | 2                  | 4    | 256 | Wild bird (1)                                     | 1              |
| 25    | 2                  | 8    | 256 | Red fox (1)                                       | 1              |
| 26    | 3                  | 0.12 | 32  | Broiler (2)                                       | 2              |
| 27    | 3                  | 0.12 | 64  | Red fox (3), Broiler (2)                          | 5              |
| 28    | 3                  | 0.12 | 128 | Broiler (3), Pig (1)                              | 4              |
| 29    | 3                  | 0.25 | 4   | Wild bird (1)                                     | 1              |
| 30    | 3                  | 0.25 | 8   | Pig (1), Red fox (1)                              | 2              |
| 31    | 3                  | 0.25 | 32  | Broiler (1)                                       | 1              |
| 32    | 3                  | 0.25 | 64  | Broiler (4), Pig (1)                              | 5              |
| 33    | 3                  | 0.25 | 128 | Broiler (10), Pig (4), Wild bird (4), Red fox (1) | 19             |
| 34    | 3                  | 0.25 | 256 | Broiler (3), Pig (1), Wild bird (4), Red fox (5)  | 13             |
| 35    | 3                  | 0.5  | 8   | Pig (1)                                           | 1              |
| 36    | 3                  | 0.5  | 16  | Pig (1), Red fox (3)                              | 4              |
| 37    | 3                  | 0.5  | 256 | Pig (1)                                           | 1              |
| 38    | 3                  | 1    | 64  | Broiler (1)                                       | 1              |
| 39    | 3                  | 2    | 128 | Broiler (1)                                       | 1              |
| 40    | 3                  | 16   | 256 | Pig (1), Wild bird (2), Red fox (1)               | 4              |

(continued)

| Group | No. of resistances | CIP  | NAL | Isolates per species                             | Total isolates |
|-------|--------------------|------|-----|--------------------------------------------------|----------------|
| 41    | 4                  | 0.03 | 64  | Pig (1)                                          | 1              |
| 42    | 4                  | 0.12 | 64  | Pig (1)                                          | 1              |
| 43    | 4                  | 0.12 | 128 | Broiler (2), Wild bird (2), Red fox (1)          | 5              |
| 44    | 4                  | 0.12 | 256 | Wild bird (1)                                    | 1              |
| 45    | 4                  | 0.25 | 4   | Wild bird (1), Red fox (3)                       | 4              |
| 46    | 4                  | 0.25 | 8   | Wild bird (4)                                    | 4              |
| 47    | 4                  | 0.25 | 16  | Pig (1), Red fox (1)                             | 2              |
| 48    | 4                  | 0.25 | 128 | Broiler (3), Pig (2)                             | 5              |
| 49    | 4                  | 0.25 | 256 | Broiler (1), Pig (2), Wild bird (3), Red fox (1) | 7              |
| 50    | 4                  | 0.5  | 16  | Wild bird (2)                                    | 2              |
| 51    | 4                  | 0.5  | 128 | Pig (1)                                          | 1              |
| 52    | 4                  | 0.5  | 256 | Broiler (3), Pig (3), Wild bird (3)              | 9              |
| 53    | 4                  | 1    | 256 | Red fox (1)                                      | 1              |
| 54    | 4                  | 4    | 256 | Broiler (1)                                      | 1              |
| 55    | 4                  | 8    | 256 | Broiler (1)                                      | 1              |
| 56    | 5                  | 0.12 | 128 | Pig (2), Red fox (1)                             | 3              |
| 57    | 5                  | 0.12 | 256 | Broiler (1)                                      | 1              |
| 58    | 5                  | 0.25 | 4   | Red fox (1)                                      | 1              |
| 59    | 5                  | 0.25 | 64  | Broiler (1), Red fox (2)                         | 3              |
| 60    | 5                  | 0.25 | 128 | Broiler (2), Pig (4), Wild bird (1)              | 7              |
| 61    | 5                  | 0.25 | 256 | Pig (1), Red fox (1)                             | 2              |
| 62    | 5                  | 0.5  | 16  | Pig (1), Wild bird (4)                           | 5              |
| 63    | 5                  | 0.5  | 64  | Broiler (1)                                      | 1              |
| 64    | 5                  | 0.5  | 128 | Broiler (1), Red fox (1)                         | 2              |
| 65    | 5                  | 0.5  | 256 | Broiler (1)                                      | 1              |
| 66    | 5                  | 1    | 64  | Broiler (1)                                      | 1              |
| 67    | 5                  | 4    | 256 | Pig (1)                                          | 1              |
| 68    | 5                  | 16   | 256 | Pig (1), Wild bird (3), Red fox (1)              | 5              |
| 69    | 6                  | 0.12 | 32  | Pig (1), Wild bird (1)                           | 2              |
| 70    | 6                  | 0.12 | 64  | Pig (2)                                          | 2              |
| 71    | 6                  | 0.25 | 4   | Pig (1)                                          | 1              |
| 72    | 6                  | 0.25 | 64  | Pig (1)                                          | 1              |
| 73    | 6                  | 0.25 | 128 | Broiler (1), Pig (1), Wild bird (2), Red fox (1) | 5              |
| 74    | 6                  | 0.25 | 256 | Pig (4), Red fox (3)                             | 7              |
| 75    | 6                  | 0.5  | 16  | Wild bird (1), Red fox (1)                       | 2              |
| 76    | 6                  | 1    | 128 | Broiler (1)                                      | 1              |
| 77    | 6                  | 1    | 256 | Wild bird (1), Red fox (1)                       | 2              |
| 78    | 6                  | 8    | 256 | Broiler (1), Pig (1), Wild bird (5)              | 7              |
| 79    | 6                  | 16   | 256 | Pig (1), Red fox (1)                             | 2              |
| 80    | 7                  | 0.25 | 128 | Red fox (1)                                      | 1              |
| 81    | 7                  | 8    | 256 | Broiler (4), Wild bird (1), Red fox (1)          | 6              |
| 82    | 7                  | 16   | 256 | Wild bird (3)                                    | 3              |
| 83    | 8                  | 0.25 | 64  | Wild bird (1)                                    | 1              |
| 84    | 8                  | 0.5  | 128 | Pig (3)                                          | 3              |
| 85    | 8                  | 8    | 256 | Red fox (1)                                      | 1              |
| 86    | 8                  | 16   | 256 | Pig (1)                                          | 1              |

**Table S2: Occurrence of antimicrobial resistance among the selected quinolone resistant isolates.**

The table presents the percent (%) occurrence of antimicrobial resistance among the selected isolates ( $n = 280$ ) identified through minimum inhibitory concentration values in the Norwegian monitoring programme from 2006 to 2017. The epidemiological cut off values used were defined by EUCAST. Azithromycin was excluded as no epidemiological cutoff value is currently available.

| Substance        | Broiler <sup>a</sup> | Pig <sup>b</sup> | Red fox <sup>c</sup> | Wild bird <sup>d</sup> | Total <sup>e</sup> |
|------------------|----------------------|------------------|----------------------|------------------------|--------------------|
| Ciprofloxacin    | 100.0                | 93.3             | 94.2                 | 98.5                   | 96.8               |
| Nalidixic acid   | 100.0                | 74.7             | 76.9                 | 68.2                   | 81.4               |
| Tetracycline     | 26.4                 | 49.3             | 46.2                 | 60.6                   | 44.3               |
| Ampicillin       | 36.8                 | 40.0             | 51.9                 | 51.5                   | 43.9               |
| Sulfamethoxazole | 28.7                 | 50.7             | 36.5                 | 36.4                   | 37.9               |
| Trimethoprim     | 17.2                 | 36.0             | 44.2                 | 36.4                   | 31.8               |
| Chloramphenicol  | 5.8                  | 10.7             | 11.5                 | 16.7                   | 10.7               |
| Cefotaxime       | 4.6                  | 2.7              | 5.8                  | 9.1                    | 5.4                |
| Ceftazidime      | 3.4                  | 2.7              | 5.8                  | 5.8                    | 5.4                |
| Gentamicin       | 0.0                  | 5.3              | 3.8                  | 9.1                    | 4.3                |
| Meropenem        | 0.0                  | 0.0              | 0.0                  | 0.0                    | 0.0                |
| Colistin         | 0.0                  | 0.0              | 0.0                  | 0.0                    | 0.0                |
| Tigecycline      | 0.0                  | 1.3              | 0.0                  | 0.0                    | 0.4                |

<sup>a</sup> 87 isolates

<sup>b</sup> 75 isolates

<sup>c</sup> 52 isolates

<sup>d</sup> 66 isolates

<sup>e</sup> 280 isolates

### Table S3: Prokka reference genomes

The genomes listed below were used as references for the Prokka annotation, and downloaded with ncbi-genome-download (<https://github.com/kbclin/ncbi-genome-download>) with the following commands:

- refseq-category reference
- assembly-level complete
- genus “Escherichia coli” bacteria

| Accession number           | Information                       |
|----------------------------|-----------------------------------|
| GCF_000005845.2_ASM584v2   | <i>E. coli</i> K12                |
| GCF_000008865.2_ASM886v2   | <i>E. coli</i> O157:H7 Sakai      |
| GCF_000026345.1_ASM2634v1  | <i>E. coli</i> IAI39              |
| GCF_000183345.1_ASM18334v1 | <i>E. coli</i> O83:H1 NRG 857C    |
| GCF_000299455.1_ASM29945v1 | <i>E. coli</i> O104:H4 2011C-3493 |

**Table S4: Identified amino acid substitutions in the QRDR of GyrA, ParC and ParE.**

The table presents the different amino acid substitutions identified in GyrA, ParC and ParE and percent occurrence in total for each amino acid substitution.

| AA substitution | n   | Total | Percent |
|-----------------|-----|-------|---------|
| <b>GyrA</b>     |     |       |         |
| S83L            | 170 | 280   | 60.7    |
| None            | 51  | 280   | 18.2    |
| S83L, D87N      | 33  | 280   | 11.8    |
| D87Y            | 11  | 280   | 3.9     |
| S83A            | 9   | 280   | 3.2     |
| D87N            | 3   | 280   | 1.1     |
| D87G            | 2   | 280   | 0.7     |
| D87H            | 1   | 280   | 0.4     |
| <b>GyrB</b>     |     |       |         |
| None            | 280 | 280   | 100.0   |
| <b>ParC</b>     |     |       |         |
| None            | 237 | 280   | 84.6    |
| S80I            | 28  | 280   | 10.0    |
| A56T, S80I      | 8   | 280   | 2.9     |
| S57T            | 2   | 280   | 0.7     |
| S58I            | 2   | 280   | 0.7     |
| S80R            | 2   | 280   | 0.7     |
| S80I, E84V      | 1   | 280   | 0.4     |
| <b>ParE</b>     |     |       |         |
| None            | 251 | 280   | 89.6    |
| D475E           | 15  | 280   | 5.4     |
| S458A           | 10  | 280   | 3.6     |
| D463N           | 1   | 280   | 0.4     |
| H516Y           | 1   | 280   | 0.4     |
| L416F           | 1   | 280   | 0.4     |
| L488M, A512T    | 1   | 280   | 0.4     |

**Table S5: QRDR substitutions in GyrA, ParC and ParE per animal species.**

The table presents each identified amino acid substitution in GyrA, ParC and ParE and their occurrence in isolates from each animal species. The percentage is based on the number of isolates per species with the mutation in question (n) in relation to the total number of isolates per animal species (Total).

| Protein          | AA substitution | n  | Total | Percent |
|------------------|-----------------|----|-------|---------|
| <b>Broiler</b>   |                 |    |       |         |
| GyrA             | S83L            | 75 | 87    | 86.2    |
| GyrA             | S83L, D87N      | 7  | 87    | 8.0     |
| GyrA             | D87N            | 2  | 87    | 2.3     |
| GyrA             | D87Y            | 2  | 87    | 2.3     |
| GyrA             | D87H            | 1  | 87    | 1.1     |
| GyrB             | None            | 87 | 87    | 100.0   |
| ParC             | None            | 79 | 87    | 90.8    |
| ParC             | S80I            | 8  | 87    | 9.2     |
| ParE             | None            | 73 | 87    | 83.9    |
| ParE             | D475E           | 13 | 87    | 14.9    |
| ParE             | L488M, A512T    | 1  | 87    | 1.1     |
| <b>Pig</b>       |                 |    |       |         |
| GyrA             | S83L            | 45 | 75    | 60.0    |
| GyrA             | None            | 19 | 75    | 25.3    |
| GyrA             | S83L, D87N      | 5  | 75    | 6.7     |
| GyrA             | S83A            | 4  | 75    | 5.3     |
| GyrA             | D87Y            | 2  | 75    | 2.7     |
| GyrB             | None            | 75 | 75    | 100.0   |
| ParC             | None            | 66 | 75    | 88.0    |
| ParC             | A56T, S80I      | 4  | 75    | 5.3     |
| ParC             | S57T            | 2  | 75    | 2.7     |
| ParC             | S80R            | 2  | 75    | 2.7     |
| ParC             | S80I            | 1  | 75    | 1.3     |
| ParE             | None            | 70 | 75    | 93.3    |
| ParE             | S458A           | 3  | 75    | 4.0     |
| ParE             | D463N           | 1  | 75    | 1.3     |
| ParE             | L416F           | 1  | 75    | 1.3     |
| <b>Red fox</b>   |                 |    |       |         |
| GyrA             | S83L            | 31 | 52    | 59.6    |
| GyrA             | None            | 10 | 52    | 19.2    |
| GyrA             | S83L, D87N      | 6  | 52    | 11.5    |
| GyrA             | D87G            | 2  | 52    | 3.8     |
| GyrA             | S83A            | 2  | 52    | 3.8     |
| GyrA             | D87Y            | 1  | 52    | 1.9     |
| GyrB             | None            | 52 | 52    | 100.0   |
| ParC             | None            | 42 | 52    | 80.8    |
| ParC             | S80I            | 8  | 52    | 15.4    |
| ParC             | A56T, S80I      | 1  | 52    | 1.9     |
| ParC             | S80I, E84V      | 1  | 52    | 1.9     |
| ParE             | None            | 49 | 52    | 94.2    |
| ParE             | D475E           | 2  | 52    | 3.8     |
| ParE             | S458A           | 1  | 52    | 1.9     |
| <b>Wild bird</b> |                 |    |       |         |

*(continued)*

| Protein | AA substitution | n  | Total | Percent |
|---------|-----------------|----|-------|---------|
| GyrA    | None            | 22 | 66    | 33.3    |
| GyrA    | S83L            | 19 | 66    | 28.8    |
| GyrA    | S83L, D87N      | 15 | 66    | 22.7    |
| GyrA    | D87Y            | 6  | 66    | 9.1     |
| GyrA    | S83A            | 3  | 66    | 4.5     |
| GyrA    | D87N            | 1  | 66    | 1.5     |
| GyrB    | None            | 66 | 66    | 100.0   |
| ParC    | None            | 50 | 66    | 75.8    |
| ParC    | S80I            | 11 | 66    | 16.7    |
| ParC    | A56T, S80I      | 3  | 66    | 4.5     |
| ParC    | S58I            | 2  | 66    | 3.0     |
| ParE    | None            | 59 | 66    | 89.4    |
| ParE    | S458A           | 6  | 66    | 9.1     |
| ParE    | H516Y           | 1  | 66    | 1.5     |



**Table S6: AA substitutions in MarA, MarR, RobA, RpoB and SoxR.**

The table presents the identified amino acid substitutions in MarA, MarR, RobA, RpoB and SoxR. The column “n” denote the amount of isolates with the respective AA substitution. The percentage is relative to the total amount of isolates.

| AA substitution            | n   | Total | Percent |
|----------------------------|-----|-------|---------|
| <b>MarA</b>                |     |       |         |
| None                       | 246 | 280   | 87.9    |
| S127N                      | 26  | 280   | 9.3     |
| L78F                       | 6   | 280   | 2.1     |
| E33V                       | 1   | 280   | 0.4     |
| P76S                       | 1   | 280   | 0.4     |
| <b>MarR</b>                |     |       |         |
| G103S, Y137H               | 192 | 280   | 68.6    |
| None                       | 68  | 280   | 24.3    |
| K62R, G103S, Y137H         | 6   | 280   | 2.1     |
| S3N, G103S, Y137H          | 6   | 280   | 2.1     |
| G103S, D118N, Y137H        | 3   | 280   | 1.1     |
| A53E, G103S, Y137H         | 1   | 280   | 0.4     |
| A53S, G103S, Y137H         | 1   | 280   | 0.4     |
| E131K                      | 1   | 280   | 0.4     |
| G103S, D118N, H120K, Y137H | 1   | 280   | 0.4     |
| T102P, G103S, Y137H        | 1   | 280   | 0.4     |
| <b>RobA</b>                |     |       |         |
| None                       | 280 | 280   | 100.0   |
| <b>RpoB</b>                |     |       |         |
| None                       | 232 | 280   | 82.9    |
| E320D                      | 33  | 280   | 11.8    |
| V261A                      | 4   | 280   | 1.4     |
| E320D, D485E               | 2   | 280   | 0.7     |
| G1318S                     | 2   | 280   | 0.7     |
| D320E                      | 1   | 280   | 0.4     |
| E320D, D393E               | 1   | 280   | 0.4     |
| E320D, F464C               | 1   | 280   | 0.4     |
| E412D, T595I               | 1   | 280   | 0.4     |
| H165Y                      | 1   | 280   | 0.4     |
| P847S                      | 1   | 280   | 0.4     |
| V980L                      | 1   | 280   | 0.4     |
| <b>SoxR</b>                |     |       |         |
| None                       | 209 | 280   | 74.6    |
| T38S, G74R                 | 33  | 280   | 11.8    |
| G74R                       | 26  | 280   | 9.3     |
| I40V                       | 4   | 280   | 1.4     |
| A111T                      | 3   | 280   | 1.1     |
| T38S, N45D, G74R           | 3   | 280   | 1.1     |
| A24T, G74R                 | 1   | 280   | 0.4     |
| E115K                      | 1   | 280   | 0.4     |

**Table S7: Mechanisms in isolates without substitutions in QRDR**

This table presents the mechanisms identified in isolates with no amino acid substitutions in either of GyrA, GyrB, ParC and/or ParE.

| marA | marR | robA | rpoB | soxR | PMQR   | n  |
|------|------|------|------|------|--------|----|
| 0    | 0    | 0    | 0    | 0    | qnrB19 | 12 |
| 0    | 0    | 0    | 0    | 0    | qnrS2  | 4  |
| 0    | 0    | 0    | 1    | 0    | qnrS1  | 1  |
| 0    | 1    | 0    | 0    | 0    | qnrA1  | 1  |
| 0    | 1    | 0    | 0    | 0    | qnrB19 | 5  |
| 0    | 1    | 0    | 0    | 0    | qnrS1  | 17 |
| 0    | 1    | 0    | 0    | 0    | qnrS2  | 2  |
| 0    | 1    | 0    | 0    | 0    | qnrS4  | 1  |
| 0    | 1    | 0    | 0    | 1    | qnrB19 | 1  |
| 0    | 1    | 0    | 0    | 1    | qnrS1  | 2  |
| 0    | 1    | 0    | 1    | 0    | qnrB19 | 1  |
| 0    | 1    | 0    | 1    | 0    | qnrS1  | 1  |
| 1    | 1    | 0    | 1    | 1    | qnrB19 | 1  |

**Table S8: Other plasmid mediated genes**

The table presents the plasmid mediated genes related to other resistance phenotypes among the isolates.

| Gene                           | Absent | Present | Total | Percent | Included |
|--------------------------------|--------|---------|-------|---------|----------|
| <i>bla</i> <sub>TEM-1B</sub>   | 182    | 98      | 280   | 35.00   | Yes      |
| <i>aph6Id</i>                  | 192    | 88      | 280   | 31.43   | Yes      |
| <i>aph3Ib</i>                  | 194    | 86      | 280   | 30.71   | Yes      |
| <i>tetA</i>                    | 202    | 78      | 280   | 27.86   | Yes      |
| <i>sul2</i>                    | 207    | 73      | 280   | 26.07   | Yes      |
| <i>tetB</i>                    | 231    | 49      | 280   | 17.50   | Yes      |
| <i>sul1</i>                    | 253    | 27      | 280   | 9.64    | Yes      |
| <i>aadA1</i>                   | 254    | 26      | 280   | 9.29    | Yes      |
| <i>dfrA5</i>                   | 255    | 25      | 280   | 8.93    | Yes      |
| <i>catA1</i>                   | 257    | 23      | 280   | 8.21    | Yes      |
| <i>dfrA17</i>                  | 259    | 21      | 280   | 7.50    | Yes      |
| <i>aadA5</i>                   | 260    | 20      | 280   | 7.14    | Yes      |
| <i>dfrA1</i>                   | 261    | 19      | 280   | 6.79    | Yes      |
| <i>dfrA14</i>                  | 263    | 17      | 280   | 6.07    | Yes      |
| <i>aph3Ia</i>                  | 266    | 14      | 280   | 5.00    | Yes      |
| <i>mphA</i>                    | 268    | 12      | 280   | 4.29    | No       |
| <i>aac(3')-IIId</i>            | 270    | 10      | 280   | 3.57    | Yes      |
| <i>aadA13</i>                  | 271    | 9       | 280   | 3.21    | Yes      |
| <i>sul3</i>                    | 271    | 9       | 280   | 3.21    | Yes      |
| <i>bla</i> <sub>TEM-1C</sub>   | 273    | 7       | 280   | 2.50    | Yes      |
| <i>aadA2</i>                   | 275    | 5       | 280   | 1.79    | Yes      |
| <i>dfrA12</i>                  | 275    | 5       | 280   | 1.79    | Yes      |
| <i>floR</i>                    | 275    | 5       | 280   | 1.79    | Yes      |
| <i>bla</i> <sub>CMY-2</sub>    | 277    | 3       | 280   | 1.07    | Yes      |
| <i>bla</i> <sub>CTX-M-15</sub> | 277    | 3       | 280   | 1.07    | Yes      |
| <i>bla</i> <sub>CTX-M-55</sub> | 277    | 3       | 280   | 1.07    | Yes      |
| <i>cmlA1</i>                   | 277    | 3       | 280   | 1.07    | Yes      |
| <i>mphB</i>                    | 277    | 3       | 280   | 1.07    | No       |
| <i>aac(3')-IIa</i>             | 278    | 2       | 280   | 0.71    | Yes      |
| <i>aadA12</i>                  | 278    | 2       | 280   | 0.71    | Yes      |
| <i>aadA22</i>                  | 278    | 2       | 280   | 0.71    | Yes      |
| <i>bla</i> <sub>CTX-M-1</sub>  | 278    | 2       | 280   | 0.71    | Yes      |
| <i>bla</i> <sub>SHV-2</sub>    | 278    | 2       | 280   | 0.71    | Yes      |
| <i>bla</i> <sub>TEM-1A</sub>   | 278    | 2       | 280   | 0.71    | Yes      |
| <i>dfrA8</i>                   | 278    | 2       | 280   | 0.71    | Yes      |
| <i>mphE</i>                    | 278    | 2       | 280   | 0.71    | No       |
| <i>msrE</i>                    | 278    | 2       | 280   | 0.71    | No       |
| <i>bla</i> <sub>CTX-M-32</sub> | 279    | 1       | 280   | 0.36    | Yes      |
| <i>bla</i> <sub>SHV-12</sub>   | 279    | 1       | 280   | 0.36    | Yes      |
| <i>ermB</i>                    | 279    | 1       | 280   | 0.36    | No       |
| <i>lnuF</i>                    | 279    | 1       | 280   | 0.36    | No       |
| <i>tetD</i>                    | 279    | 1       | 280   | 0.36    | Yes      |

**Table S9: Co-resistance**

The table presents the number of isolates with each combination of plasmid mediated resistance genes, excluding combinations represented by only a single isolate.

| Combination of genes                                                           | Number of isolates |
|--------------------------------------------------------------------------------|--------------------|
| <b>PMQR Negative</b>                                                           |                    |
| <i>tet</i>                                                                     | 18                 |
| <i>sul</i>                                                                     | 2                  |
| <i>dfrA</i>                                                                    | 10                 |
| <i>bla</i> <sub>TEM</sub>                                                      | 5                  |
| <i>bla</i> <sub>SHV</sub>                                                      | 2                  |
| <i>bla</i> <sub>CMY</sub>                                                      | 3                  |
| <i>aph</i>                                                                     | 5                  |
| <i>sul, tet</i>                                                                | 2                  |
| <i>bla</i> <sub>TEM</sub> , <i>tet</i>                                         | 3                  |
| <i>aph, tet</i>                                                                | 4                  |
| <i>aph, sul</i>                                                                | 4                  |
| <i>aadA, dfrA</i>                                                              | 4                  |
| <i>bla</i> <sub>TEM</sub> , <i>sul, tet</i>                                    | 2                  |
| <i>aph, sul, tet</i>                                                           | 2                  |
| <i>aph, dfrA, sul</i>                                                          | 4                  |
| <i>aph, bla</i> <sub>TEM</sub> , <i>tet</i>                                    | 6                  |
| <i>aph, bla</i> <sub>TEM</sub> , <i>sul</i>                                    | 2                  |
| <i>aadA, bla</i> <sub>TEM</sub> , <i>sul</i>                                   | 3                  |
| <i>aph, bla</i> <sub>TEM</sub> , <i>sul, tet</i>                               | 2                  |
| <i>aph, bla</i> <sub>TEM</sub> , <i>dfrA, sul</i>                              | 9                  |
| <i>aph, bla</i> <sub>CTX-M</sub> , <i>sul, tet</i>                             | 2                  |
| <i>aadA, dfrA, sul, tet</i>                                                    | 2                  |
| <i>aadA, bla</i> <sub>TEM</sub> , <i>sul, tet</i>                              | 2                  |
| <i>aadA, bla</i> <sub>TEM</sub> , <i>dfrA, tet</i>                             | 2                  |
| <i>aph, bla</i> <sub>TEM</sub> , <i>dfrA, sul, tet</i>                         | 10                 |
| <i>aadA, bla</i> <sub>TEM</sub> , <i>dfrA, sul, tet</i>                        | 2                  |
| <i>aac(3')-II, aph, bla</i> <sub>TEM</sub> , <i>sul, tet</i>                   | 2                  |
| <i>catA, aadA, dfrA, sul, tet</i>                                              | 2                  |
| <i>catA, aadA, bla</i> <sub>TEM</sub> , <i>dfrA, tet</i>                       | 2                  |
| <i>aadA, aph, bla</i> <sub>TEM</sub> , <i>dfrA, sul, tet</i>                   | 9                  |
| <i>catA, aadA, aph, bla</i> <sub>TEM</sub> , <i>dfrA, sul, tet</i>             | 8                  |
| <i>catA, aac(3')-II, aadA, bla</i> <sub>TEM</sub> , <i>dfrA, sul, tet</i>      | 2                  |
| <i>catA, aac(3')-II, aadA, aph, bla</i> <sub>TEM</sub> , <i>dfrA, sul, tet</i> | 2                  |
| <b>PMQR Positive</b>                                                           |                    |
| <i>qnr</i>                                                                     | 14                 |
| <i>qnr, tet</i>                                                                | 2                  |
| <i>bla</i> <sub>TEM</sub> , <i>qnr</i>                                         | 4                  |
| <i>aph, qnr</i>                                                                | 3                  |
| <i>bla</i> <sub>TEM</sub> , <i>qnr, tet</i>                                    | 5                  |
| <i>bla</i> <sub>TEM</sub> , <i>dfrA, qnr, tet</i>                              | 4                  |
| <i>aph, bla</i> <sub>TEM</sub> , <i>qnr, tet</i>                               | 2                  |
| <i>aac(3')-II, bla</i> <sub>CTX-M</sub> , <i>qnr, tet</i>                      | 3                  |
| <i>aadA, dfrA, qnr, sul, tet</i>                                               | 3                  |
| <i>aph, bla</i> <sub>TEM</sub> , <i>dfrA, qnr, sul, tet</i>                    | 2                  |

**Table S10: SNP distance statistics on isolates from the same species.**

The table presents the summary statistics on the minimum SNP distance to the closest isolate from same animal species.

| Statistic | Broiler | Pig   | Red fox | Wild bird |
|-----------|---------|-------|---------|-----------|
| Min       | 0       | 0     | 0       | 0         |
| 1st.Q     | 2       | 2     | 9       | 1         |
| Median    | 12      | 212   | 1388    | 53        |
| Mean      | 3193    | 4310  | 7210    | 5323      |
| 3rd.Q     | 52      | 3471  | 12945   | 7922      |
| Max       | 75534   | 47826 | 46955   | 33629     |

## Section 2: Supplementary figures

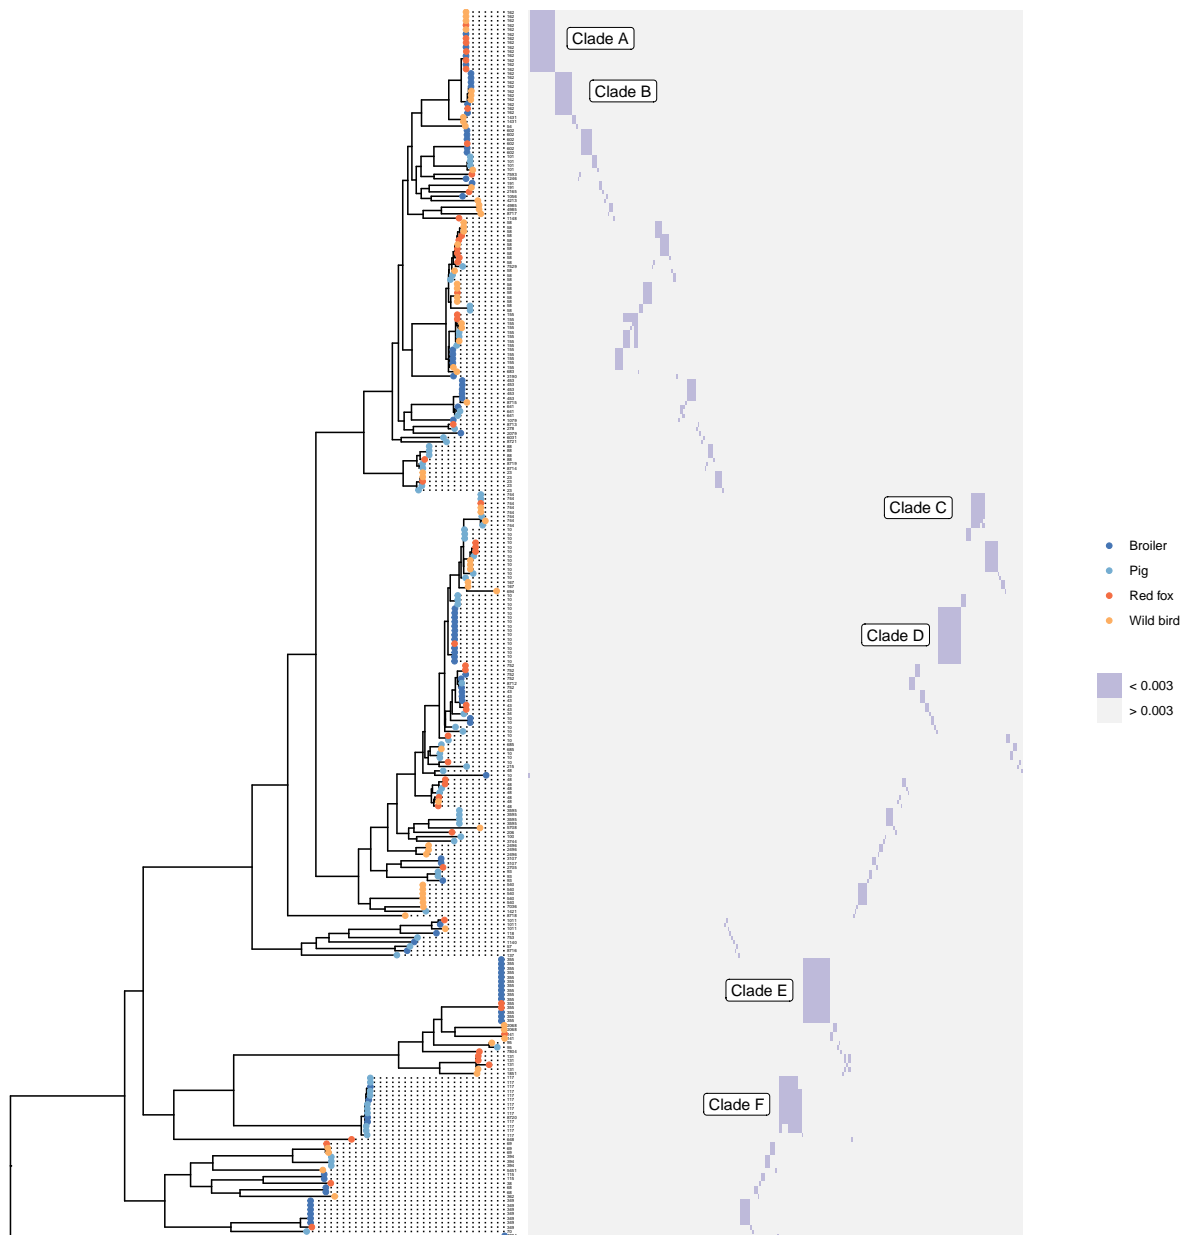

**Figure S1: Clade selection based on patristic distances**

The figure presents the overall phylogenetic tree (left) and the calculated patristic distances (right) as less than (<) or higher than (>) the specified cutoff value (0.003). The denoted clades were further investigated with phylogenetic analyses. Patristic distances were calculated from the core gene SNP tree.

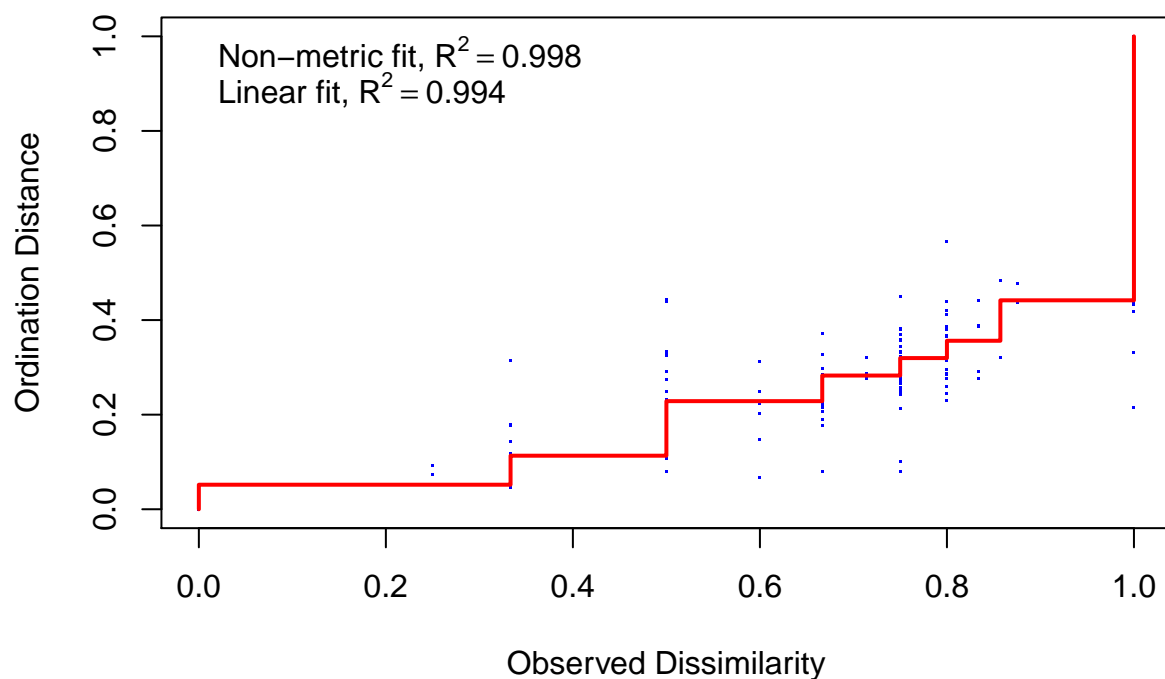

**Figure S2: Stressplot**

Non-metric multidimensional scaling (NMDS) was used to see if the distribution of quinolone resistance mechanisms from some sequence types were more homogenous than in other sequence types. The stressplot visualizes the goodness of fit.

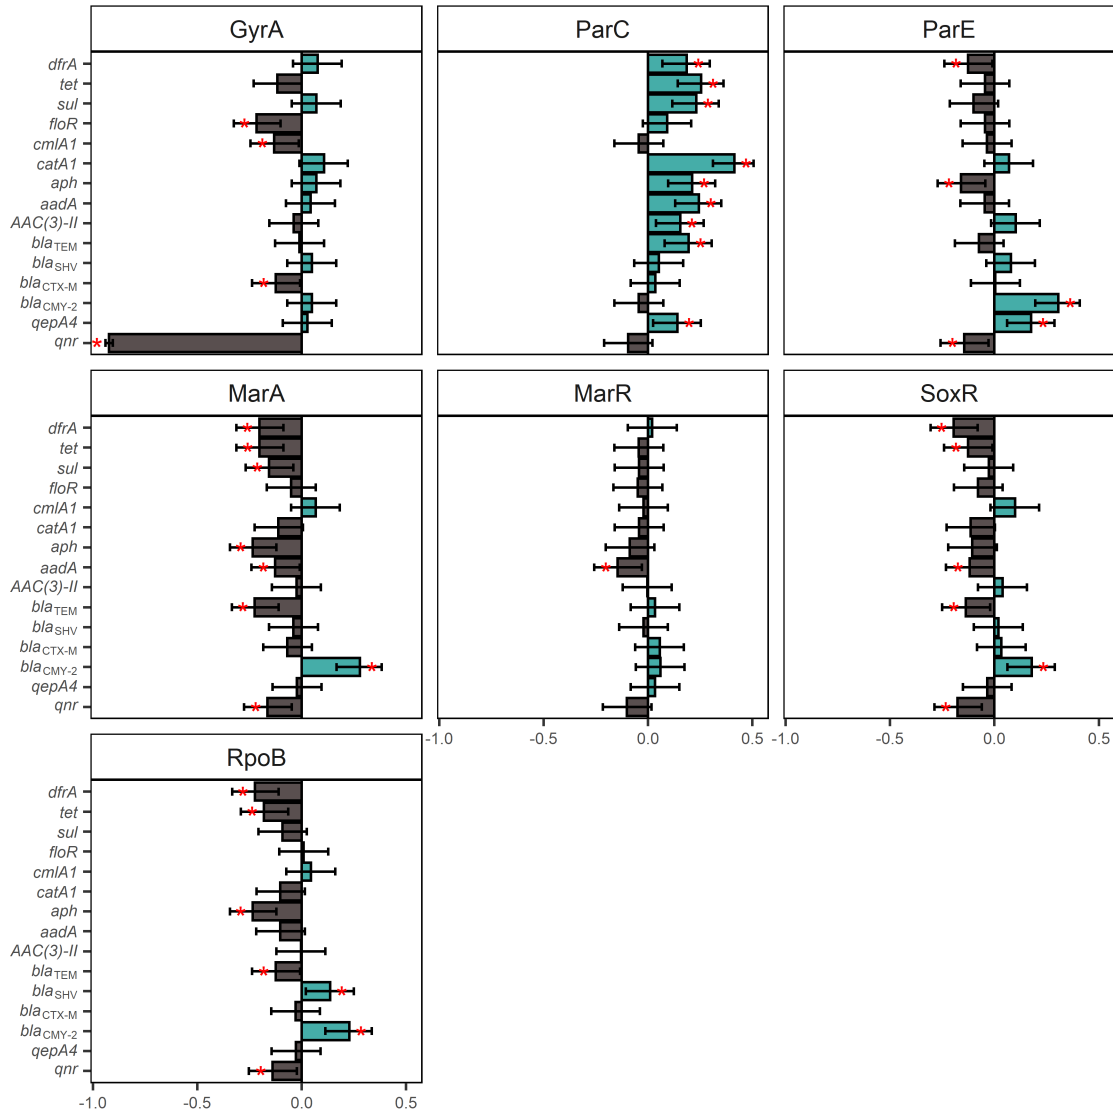

**Figure S3: Correlations between chromosomal genes and plasmid mediated genes**

The figure presents the Pearson correlation values for amino acid substitutions in GyrA, ParC, ParE, MarA, MarR, RpoB, and SoxR against all plasmid mediated genes identified. Grey = negative correlation, green = positive correlation. Black lines denote 95% confidence intervals. Red stars denote significant correlations. The plasmid mediated genes are grouped based on gene family: *dfrA* = *dfrA1*, *dfrA5*, *dfrA8*, *dfrA12*, *dfrA14*, and *dfrA17*. *tet* = *tetA*, *tetB*, and *tetD*. *sul* = *sul1* - 3. *aph* = *aph3Ia*, *aph3Ib*, and *aph6Id*. *aadA* = *aadA1*, *aadA2*, *aadA5*, *aadA12*, *aadA13*, and *aadA22*. *AAC(3')-II* = *AAC(3')-IIa* and *AAC(3')-IIc*. *bla<sub>TEM</sub>* = *bla<sub>TEM-1-A</sub>* - *bla<sub>TEM-1-C</sub>*. *bla<sub>SHV</sub>* = *bla<sub>SHV-2</sub>* and *bla<sub>SHV-12</sub>*. *bla<sub>CTX-M</sub>* = *bla<sub>CTX-M-1</sub>*, *bla<sub>CTX-M-15</sub>*, *bla<sub>CTX-M-32</sub>*, and *bla<sub>CTX-M-55</sub>*. *qnr* = *qnrA1*, *qnrB19*, *qnrS1*, *qnrS2*, and *qnrS4*.



## Distribution of expected values

Number of iterations: 1000

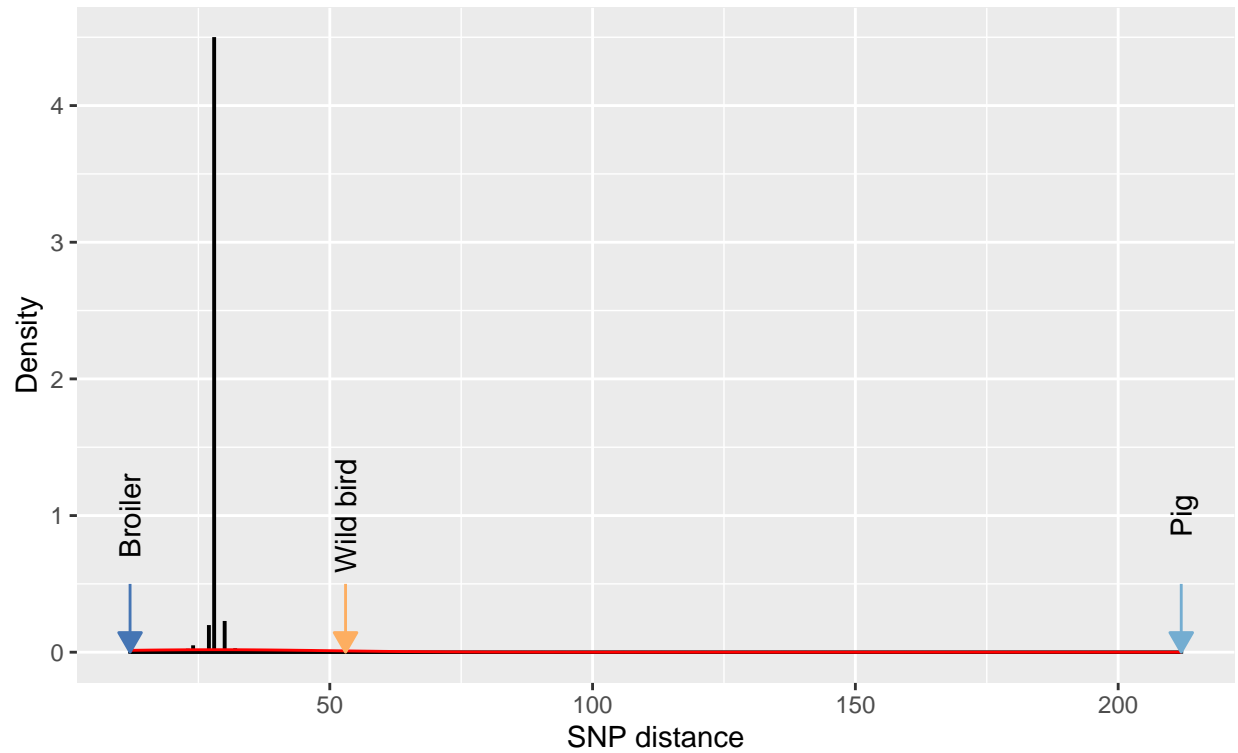

**Figure S4: Iteration analysis results**

The figure presents the observed median minimum SNP distance values for each animal species (coloured arrows) in relation to the expected values from the iteration analysis. Red fox results are excluded from the plot as the observed distance values were too high to visualize. The figure shows that isolates from broilers are more closely aggregated in the phylogenetic tree than what is randomly expected.

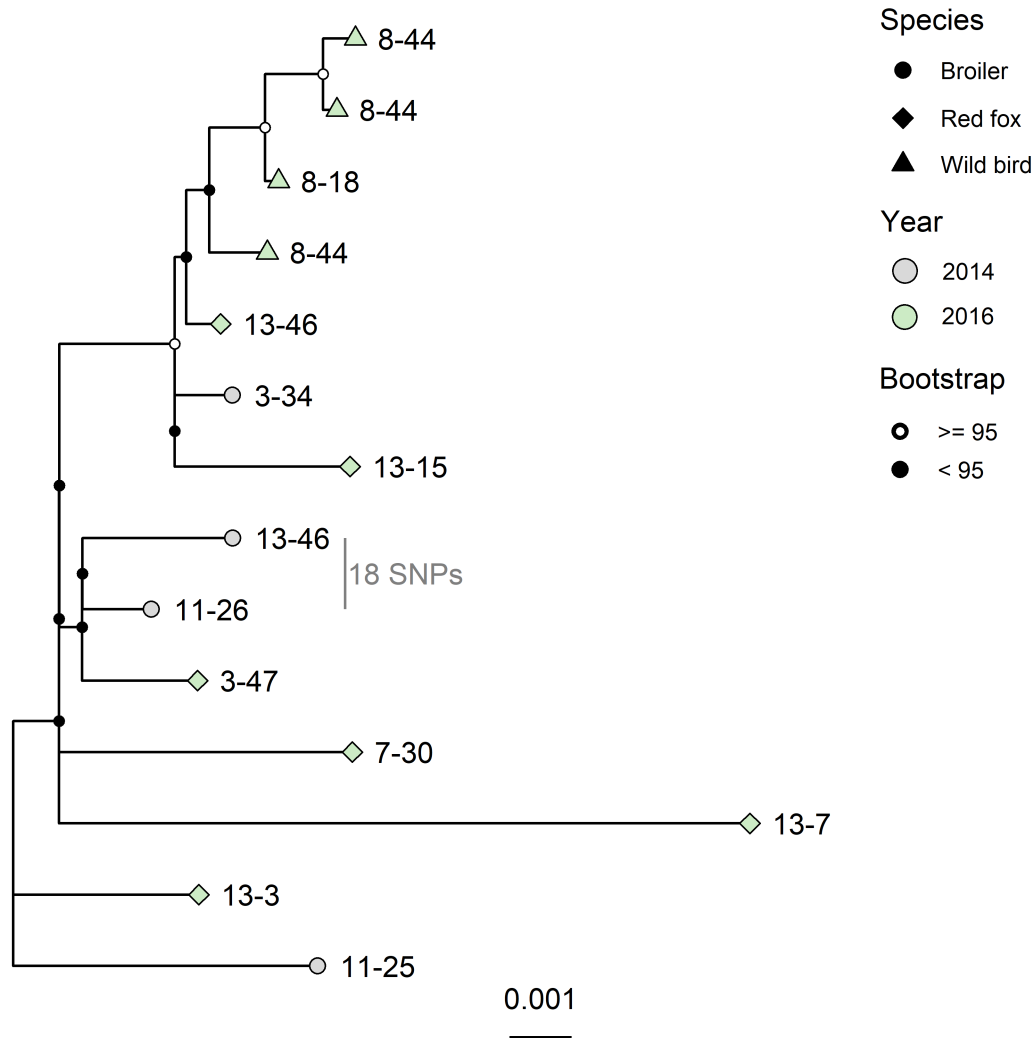

**Figure S5: Maximum likelihood tree, Clade A**

The values on each node is the UF Bootstrap values calculated by IQTree. The tip point shape represent the animal species of origin, and the color the year of isolation. The tip labels represent the location of the isolate; the first number represent the county, and the second number the municipality. Evolutionary model: K2P+ASC+R2. Shared genome: 88.4%.

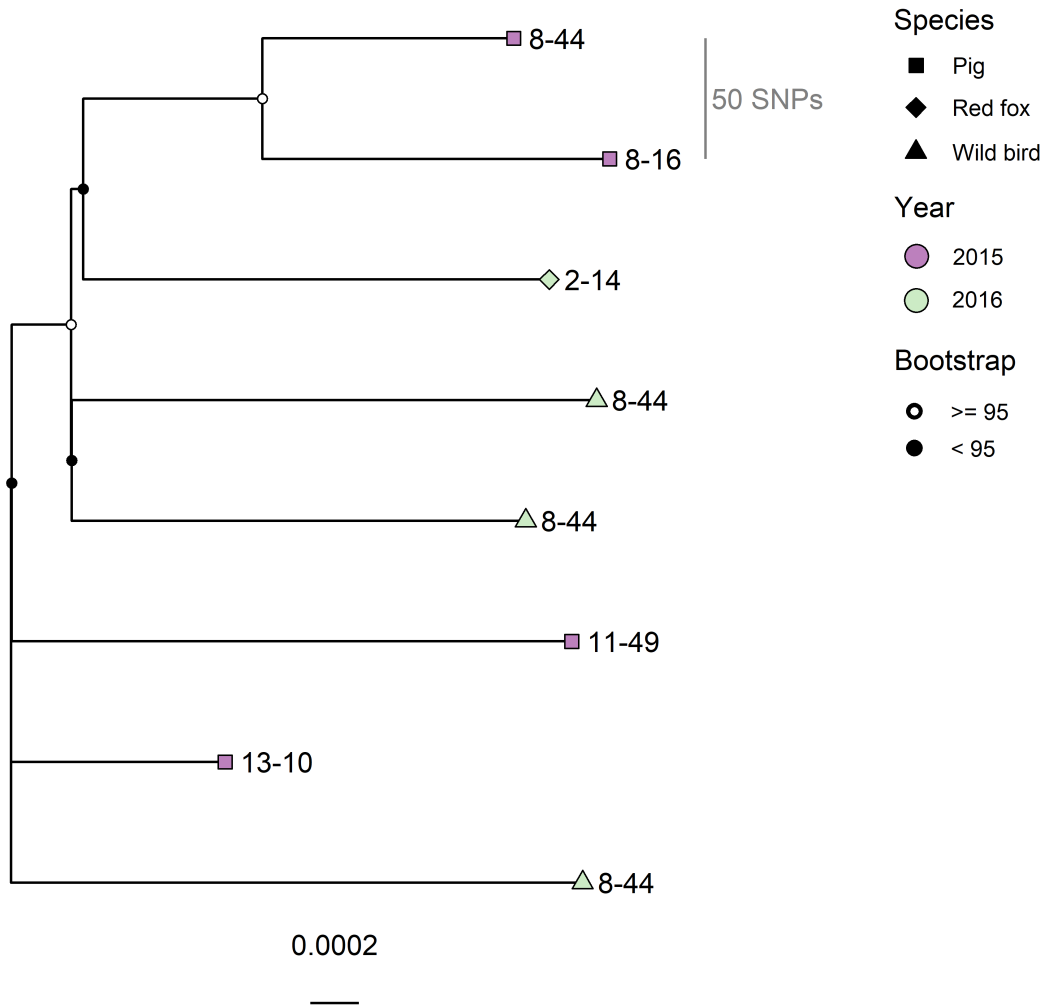

**Figure S6: Maximum likelihood tree, Clade C**

The values on each node is the UF Bootstrap values calculated by IQTree. The tip point shape represent the animal species of origin, and the color the year of isolation. The tip labels represent the location of the isolate; the first number represent the county, and the second number the municipality. Evolutionary model: K3P+ASC. Shared genome: 88.4%.

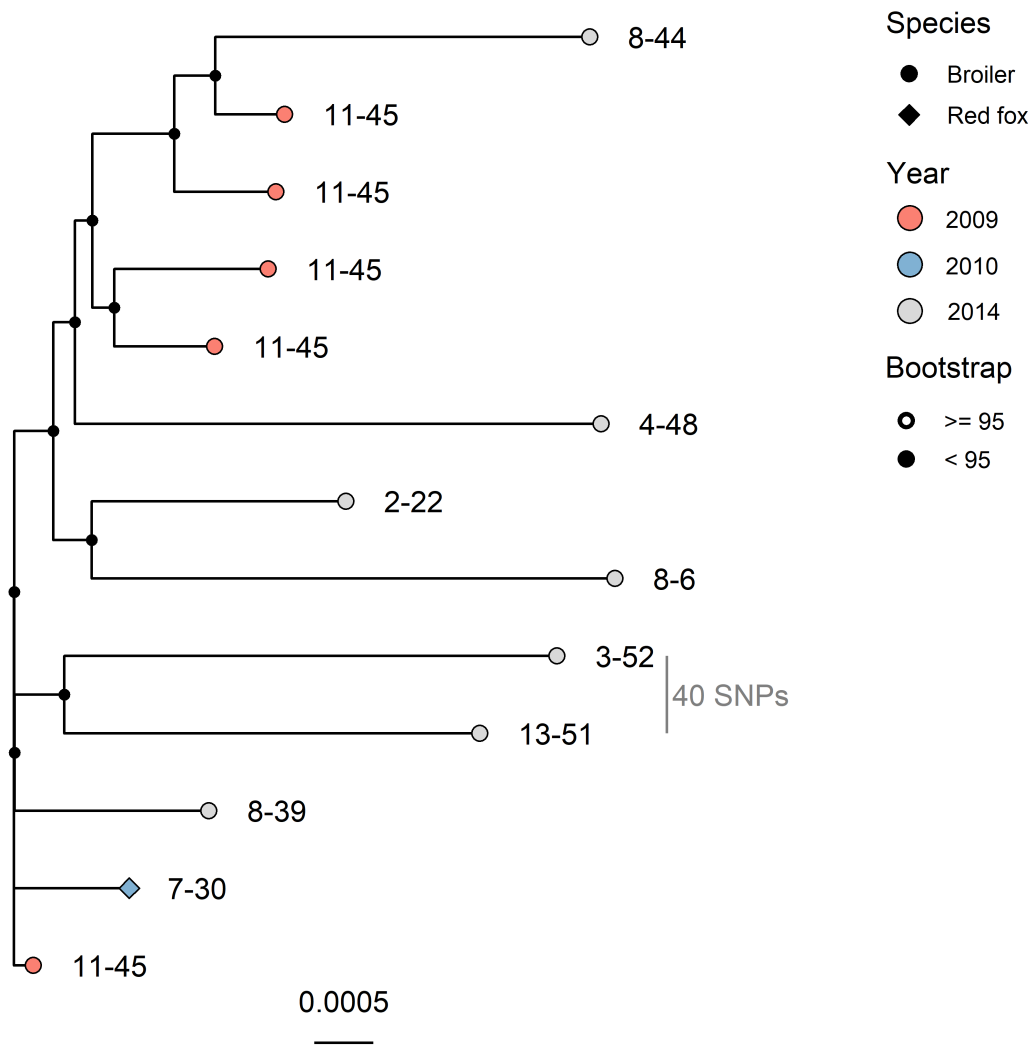

**Figure S7: Maximum likelihood tree, Clade D**

The values on each node is the UF Bootstrap values calculated by IQTree. The tip point shape represent the animal species of origin, and the color the year of isolation. The tip labels represent the location of the isolate; the first number represent the county, and the second number the municipality. Evolutionary model: K2P+ASC+R2. Shared genome: 87.2%.

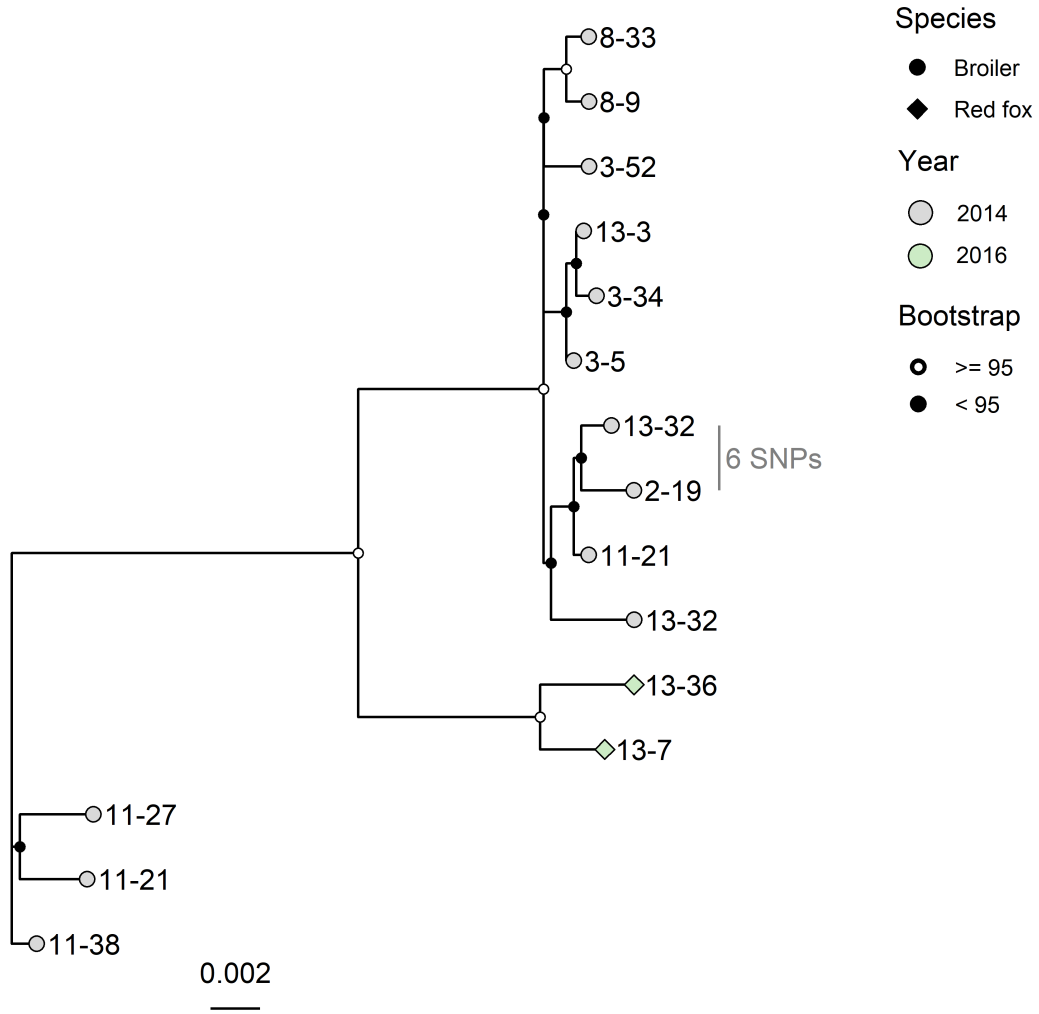

**Figure S8: Maximum likelihood tree, Clade E**

The values on each node is the UF Bootstrap values calculated by IQTree. The tip point shape represent the animal species of origin, and the color the year of isolation. The tip labels represent the location of the isolate; the first number represent the county, and the second number the municipality. Evolutionary model: K3P+ASC. Shared genome: 90.2%.

## Section 3: Metadata and reference sequences

### 3.1: Isolate information and metadata

Metadata for all 280 included isolates can be downloaded here:

[https://norwegianveterinaryinstitute.github.io/qm\\_wgs\\_4species/total\\_data\\_new.xlsx](https://norwegianveterinaryinstitute.github.io/qm_wgs_4species/total_data_new.xlsx)

### 3.2: FastQC analysis results

Raw read quality control results can be accessed here:

[https://norwegianveterinaryinstitute.github.io/qm\\_wgs\\_4species/notebooks/fastqc\\_analysis.html](https://norwegianveterinaryinstitute.github.io/qm_wgs_4species/notebooks/fastqc_analysis.html)

### 3.3: Mash screen results

Contaminant screening results can be accessed here:

[https://norwegianveterinaryinstitute.github.io/qm\\_wgs\\_4species/notebooks/mash\\_analysis.html](https://norwegianveterinaryinstitute.github.io/qm_wgs_4species/notebooks/mash_analysis.html)

### 3.4: QRDR determination of GyrB, ParC and ParE

The K12 reference sequence on the whole protein is listed as the first entry in each file. The rest of the fasta entries are taken from Jiménez Gómez et al. 2004 [1].

GyrB:

[https://norwegianveterinaryinstitute.github.io/qm\\_wgs\\_4species/reference\\_genes/gyrB\\_QRDR\\_ref.fasta](https://norwegianveterinaryinstitute.github.io/qm_wgs_4species/reference_genes/gyrB_QRDR_ref.fasta)

ParC:

[https://norwegianveterinaryinstitute.github.io/qm\\_wgs\\_4species/reference\\_genes/parC\\_QRDR\\_ref.fasta](https://norwegianveterinaryinstitute.github.io/qm_wgs_4species/reference_genes/parC_QRDR_ref.fasta)

ParE:

[https://norwegianveterinaryinstitute.github.io/qm\\_wgs\\_4species/reference\\_genes/parE\\_QRDR\\_ref.fasta](https://norwegianveterinaryinstitute.github.io/qm_wgs_4species/reference_genes/parE_QRDR_ref.fasta)

### 3.5: ARIBA flag selection

Data on ARIBA flag selection can be downloaded here:

[https://norwegianveterinaryinstitute.github.io/qm\\_wgs\\_4species/ariba\\_flag\\_selection.xlsx](https://norwegianveterinaryinstitute.github.io/qm_wgs_4species/ariba_flag_selection.xlsx)

### 3.6: MEGARes and ResFinder reference sequences

MEGARes:

[https://norwegianveterinaryinstitute.github.io/qm\\_wgs\\_4species/reference\\_genes/total\\_megares\\_references.fasta](https://norwegianveterinaryinstitute.github.io/qm_wgs_4species/reference_genes/total_megares_references.fasta)

ResFinder:

[https://norwegianveterinaryinstitute.github.io/qm\\_wgs\\_4species/reference\\_genes/total\\_resfinder\\_references.fasta](https://norwegianveterinaryinstitute.github.io/qm_wgs_4species/reference_genes/total_resfinder_references.fasta)

### **3.7: QUAST results**

Assembly metrics can be accessed here:

[https://norwegianveterinaryinstitute.github.io/qm\\_wgs\\_4species/notebooks/assembly\\_\\_metrics.html](https://norwegianveterinaryinstitute.github.io/qm_wgs_4species/notebooks/assembly__metrics.html)

## References

- [1] P.A. JG, J.E. G de los R, A. RM, P. de PR, R. GA. 2004. Molecular basis of quinolone resistance in *Escherichia coli* from wild birds. *Canadian Journal of Veterinary Research* 68:229–231
